# Supplementary material for: Yolk–shell or yolk-in-shell nanocatalysts? A proof-of-concept study
Source: Royal Society of Chemistry journal article supplement (doi:10.1039/c9ta13390a), 2020-01-01
Supplement: c9ta13390a1.pdf [file c9ta13390a1.pdf]

## **Yolk-Shell or Yolk-in-Shell Nanocatalysts? A Proof-of-Concept**

### **Study**

Jun Hu, Ruyi Li, Jie Han,\* Jia Sun, Yang Wang, Lei Yu, Rong Guo\*

School of Chemistry and Chemical Engineering, Yangzhou University, Yangzhou,

Jiangsu, 225002, P. R. China. E-mail: hanjie@yzu.edu.cn; guorong@yzu.edu.cn

**Characterization data of epoxide:** (E)-4-(2,2,6-trimethyl-7-oxabicyclo [4.1.0] heptan-1-yl) but-3-en-2-one:

$^1\text{H}$  NMR (600 MHz,  $\text{CDCl}_3$ , TMS, ppm) :  $\delta$  7.02 (dd, J = 15.7, 2.9 Hz, 1H), 6.29 (dd, J = 15.7, 3.0 Hz, 1H), 2.28 (d, J = 2.9 Hz, 3H), 1.91 (dt, J = 16.0, 8.4 Hz, 1H), 1.45 (dq, J = 14.9, 10.5, 9.1, 4.7 Hz, 4H), 1.26 (s, 2H), 1.15 (d, J = 2.9 Hz, 6H), 0.94 (d, J = 2.9 Hz, 3H);  $^{13}\text{C}$  NMR (151 MHz,  $\text{CDCl}_3$ , TMS, ppm):  $\delta$  196.55 , 141.64 , 131.43 , 69.60 , 64.87 , 34.46 , 32.53 , 28.74 , 27.27 , 24.88 , 19.82 , 15.86 . Known compound.

# <sup>1</sup>H NMR spectrum of epoxide

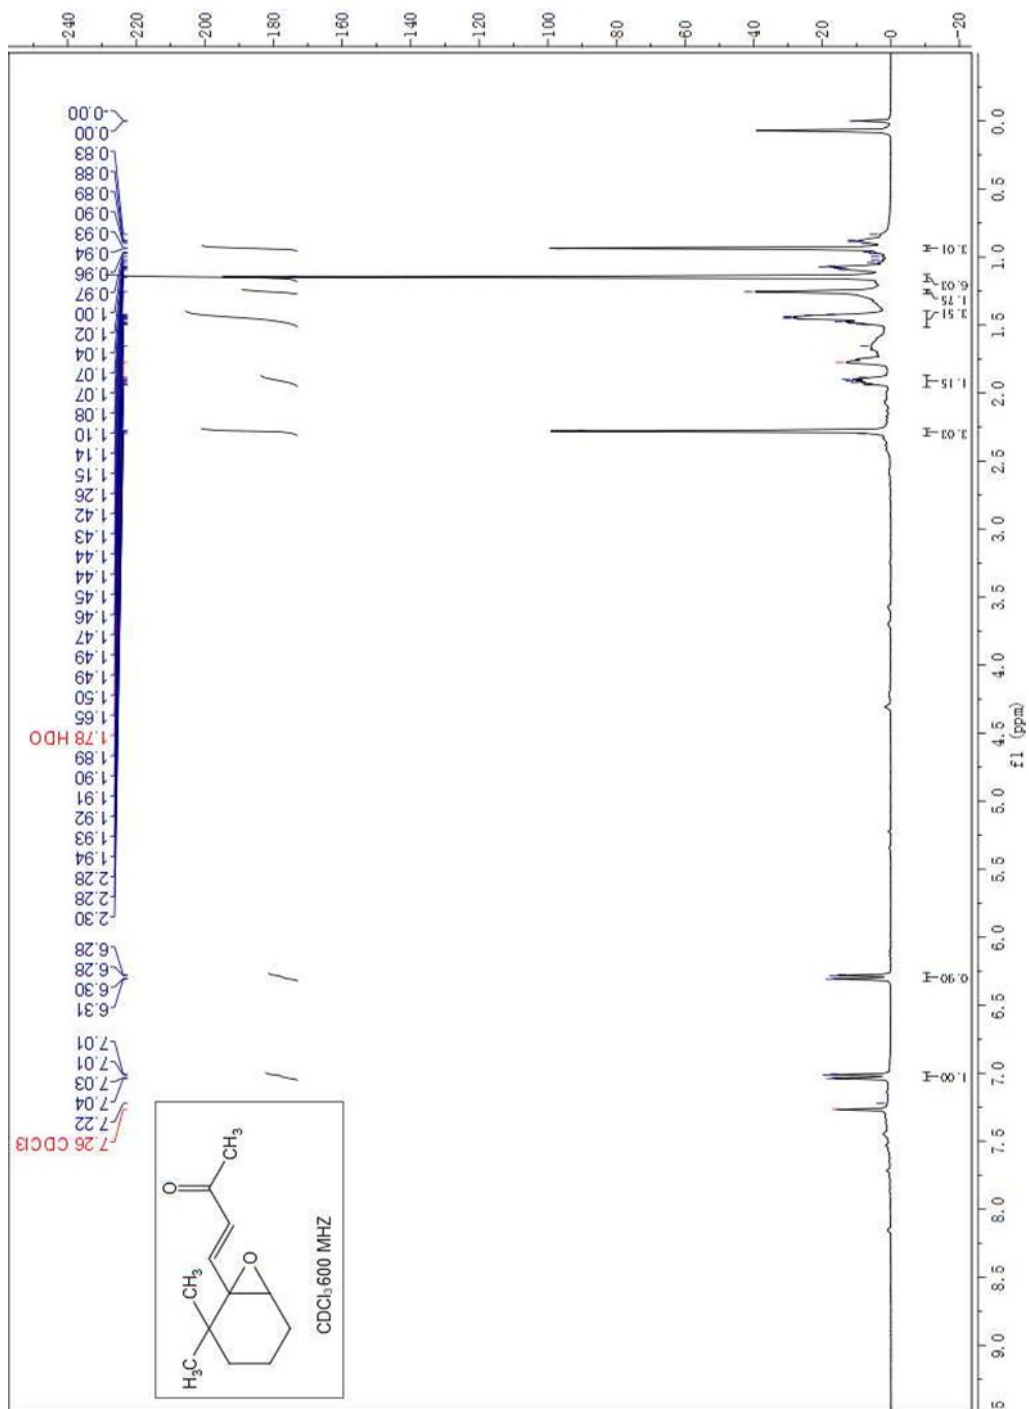

# <sup>13</sup>C NMR spectrum of epoxide

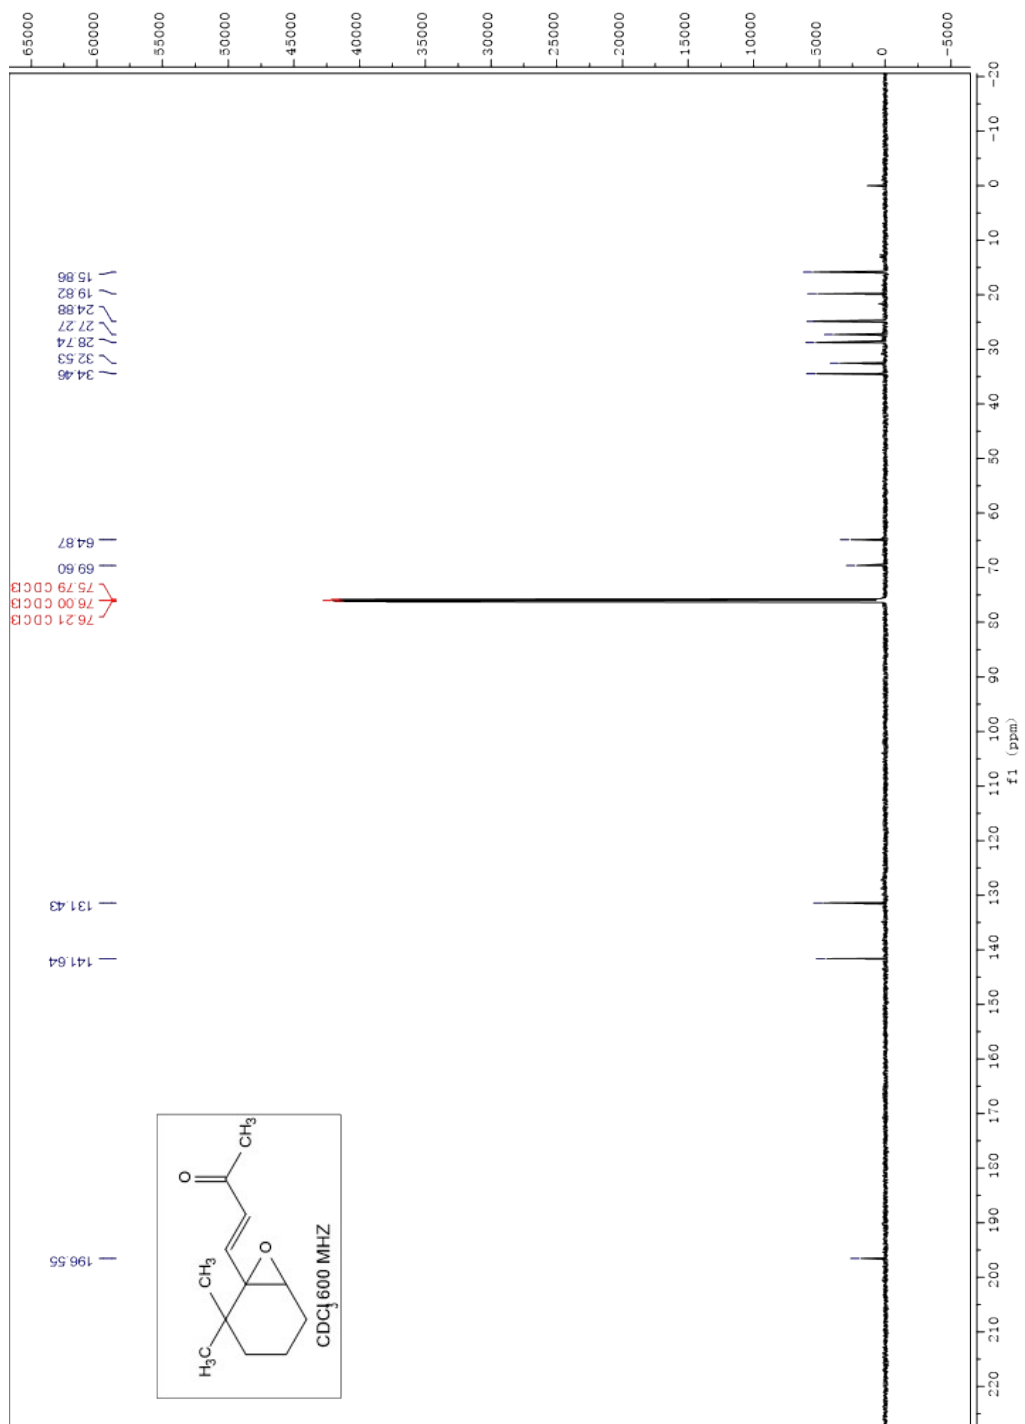

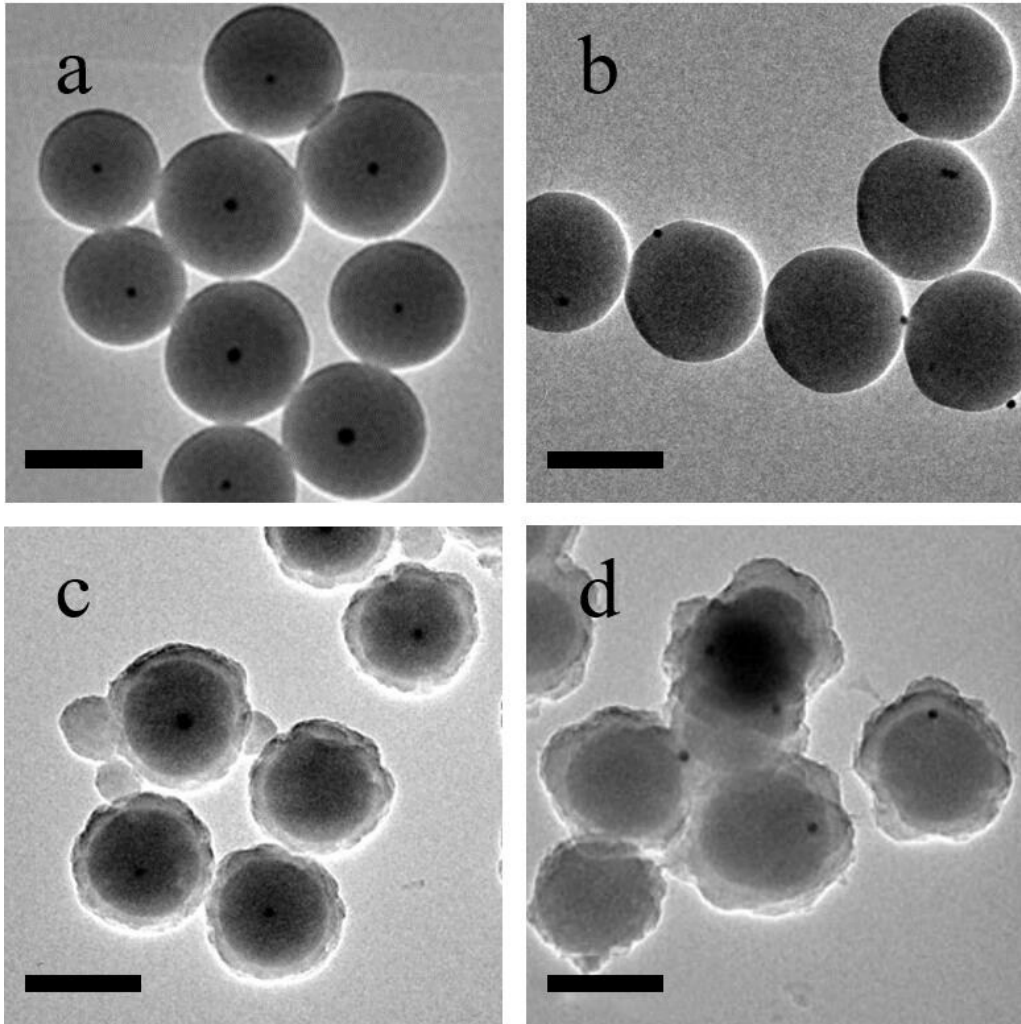

**Figure S1** TEM images of (a)  $\text{Au@SiO}_2$ ; (b)  $\text{SiO}_2\text{@Au}$ ; (c)  $\text{Au@SiO}_2\text{@PDA}$  and (d)  $\text{SiO}_2\text{@Au@PDA}$  hybrids. Scale bar: 200 nm.

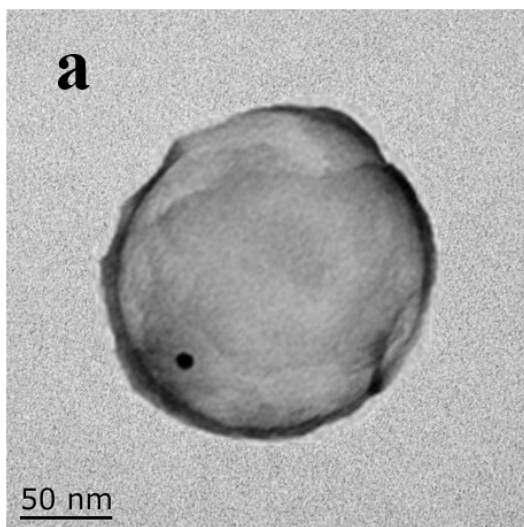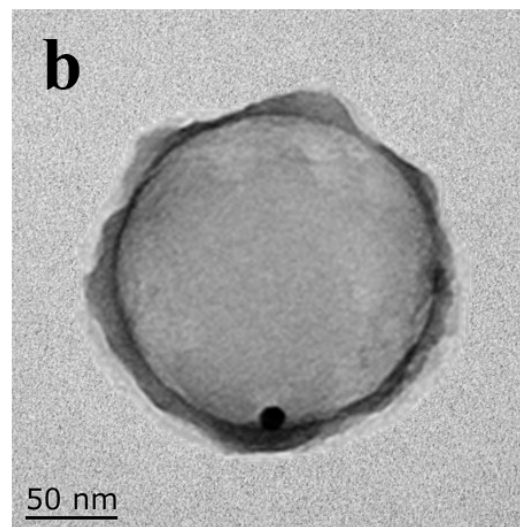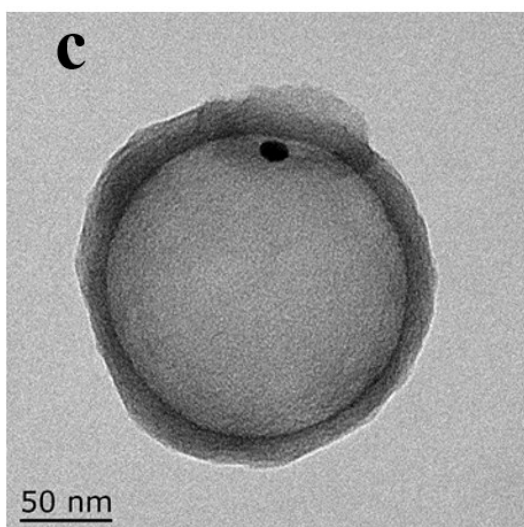

**Figure S2** TEM images of (a) Au@C(50), (b) Au@C(75) and (c) Au@C(100) yolk-shell nanostructures.

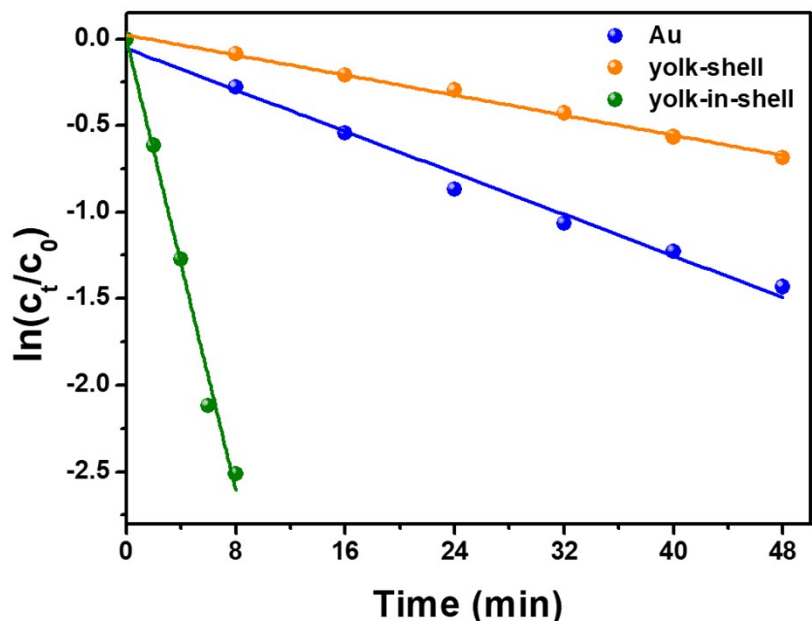

**Figure S3** Plots of  $\ln(C_t/C_0)$  of 4-NP against time using Au nanoparticles, Au@C yolk-shell and yolk-in-shell nanostructures as catalysts.
